# Supplementary material
Source: PubMed Central journal article supplement (PMC2777023)
Supplement: gzp060_1.pdf [file gzp060_1.pdf]

Supplementary Table 1: Integration vs total viral DNA

| cell type                  | Virus                     | MOI | integration events | Total viral DNA Copies | average integration % |
|----------------------------|---------------------------|-----|--------------------|------------------------|-----------------------|
| H9                         | WT VSV-G HXB2             | 1   | 0.992±0.006        | 32.722±1.984           | 3.032                 |
|                            |                           | 2   | 1.063±0.018        | 54.520±4.568           | 1.949                 |
|                            | WT VSV-G pLAI             | 1   | 1.047±0.063        | 31.367±2.893           | 3.339                 |
|                            |                           | 2   | 1.095±0.004        | 58.416±2.113           | 1.874                 |
|                            | Delta Rev VSV-G pLAIY47H2 | 1   | 7.724±0.251        | 30.580±1.922           | 25.258                |
|                            |                           | 2   | 9.701±0.139        | 53.975±3.168           | 17.974                |
|                            | Rev M10 VSV-G             | 1   | 1.185±0.075        | 30.989±2.016           | 3.824                 |
|                            |                           | 2   | 1.073±0.091        | 53.231±4.112           | 2.015                 |
| IN mutant D64A D116A VSV-G | 1                         | 0   | 31.043±1.378       | 0                      |                       |
|                            | 2                         | 0   | 54.878±4.898       | 0                      |                       |
| Sup T1                     | WT VSV-G HXB2             | 1   | 1.109±0.043        | 32.099±4.012           | 3.454                 |
|                            |                           | 2   | 1.053±0.019        | 53.295±1.595           | 1.975                 |
|                            | WT VSV-G pLAI             | 1   | 1.130±0.183        | 32.110±1.493           | 3.520                 |
|                            |                           | 2   | 1.144±0.064        | 54.809±2.666           | 2.088                 |
|                            | Delta Rev VSV-G pLAIY47H2 | 1   | 7.837±0.070        | 32.619±3.742           | 24.025                |
|                            |                           | 2   | 9.711±0.167        | 53.553±2.292           | 18.133                |
|                            | Rev M10 VSV-G             | 1   | 1.138±0.105        | 31.829±3.652           | 3.577                 |
|                            |                           | 2   | 1.348±0.186        | 55.404±3.834           | 2.433                 |
| IN mutant D64A D116A VSV-G | 1                         | 0   | 32.930±1.759       | 0                      |                       |
|                            | 2                         | 0   | 55.465±3.444       | 0                      |                       |
| T2M-bl                     | WT VSV-G HXB2             | 1   | 1.094±0.069        | 32.898±4.356           | 3.325                 |
|                            |                           | 2   | 1.434±0.108        | 54.336±0.925           | 2.639                 |
|                            | WT VSV-G pLAI             | 1   | 1.102±0.038        | 31.921±2.936           | 3.453                 |
|                            |                           | 2   | 1.616±0.115        | 53.063±2.498           | 3.045                 |
|                            | Delta Rev VSV-G pLAIY47H2 | 1   | 7.832±0.057        | 31.925±2.630           | 24.532                |
|                            |                           | 2   | 9.642±0.067        | 56.260±2.076           | 17.139                |
|                            | Rev M10 VSV-G             | 1   | 1.222±0.085        | 30.880±2.991           | 3.958                 |
|                            |                           | 2   | 1.629±0.150        | 52.411±1.452           | 3.109                 |
| IN mutant D64A D116A VSV-G | 1                         | 0   | 31.397±3.258       | 0                      |                       |
|                            | 2                         | 0   | 53.071±1.708       | 0                      |                       |
| 293T cells                 | WT VSV-G HXB2             | 1   | 1.634±0.025        | 27.890±1.189           | 5.860                 |
|                            |                           | 2   | 1.957±0.042        | 50.474±1.182           | 3.877                 |
|                            | WT VSV-G pLAI             | 1   | 1.657±0.022        | 26.932±1.944           | 6.153                 |
|                            |                           | 2   | 2.076±0.010        | 48.507±1.071           | 4.280                 |
|                            | Delta Rev VSV-G pLAIY47H2 | 1   | 8.784±0.131        | 27.750±2.152           | 31.654                |
|                            |                           | 2   | 10.031±0.130       | 47.604±1.510           | 21.072                |
|                            | Rev M10 VSV-G             | 1   | 1.821±0.095        | 27.029±1.597           | 6.737                 |
|                            |                           | 2   | 2.174±0.064        | 48.432±1.442           | 4.488                 |
| IN mutant D64A D116A VSV-G | 1                         | 0   | 28.936±2.448       | 0                      |                       |
|                            | 2                         | 0   | 49.737±3.247       | 0                      |                       |

|                            |                               |   |             |              |       |
|----------------------------|-------------------------------|---|-------------|--------------|-------|
| Rev<br>expressing<br>cells | WT VSV-G<br>HXB2              | 1 | 0.114±0.010 | 27.711±3.091 | 0.411 |
|                            |                               | 2 | 0.176±0.011 | 52.665±0.910 | 0.334 |
|                            | WT VSV-G pLAI                 | 1 | 0.106±0.017 | 27.162±3.473 | 0.390 |
|                            |                               | 2 | 0.179±0.002 | 53.603±0.756 | 0.334 |
|                            | Delta Rev VSV-<br>G pLAIY47H2 | 1 | 0.520±0.015 | 28.876±3.504 | 1.801 |
|                            |                               | 2 | 0.563±0.320 | 55.033±2.398 | 1.023 |
|                            | Rev M10 VSV-G                 | 1 | 0.120±0.021 | 29.535±4.772 | 0.405 |
|                            |                               | 2 | 0.390±0.310 | 54.057±0.596 | 0.722 |
|                            | IN mutant D64A<br>D116A VSV-G | 1 | 0           | 30.719±3.372 | 0     |
|                            |                               | 2 | 0           | 55.705±1.849 | 0     |

Supplementary Table 2: Integration vs total viral DNA

| cell type and treatment      | Virus                     | MOI | integration events | Total viral DNA Copies | average integration % |
|------------------------------|---------------------------|-----|--------------------|------------------------|-----------------------|
| 293T cells + INr-1           | WT VSV-G HXB2             | 1   | 5.911±0.671        | 35.624±1.177           | 16.592                |
|                              |                           | 2   | 6.433±0.667        | 54.235±4.340           | 11.862                |
|                              | WT VSV-G pLAI             | 1   | 5.827±0.845        | 34.302±1.133           | 16.987                |
|                              |                           | 2   | 6.215±0.684        | 52.540±4.239           | 11.829                |
|                              | Delta Rev VSV-G pLAIY47H2 | 1   | 8.347±1.029        | 31.119±1.028           | 26.824                |
|                              |                           | 2   | 8.919±0.901        | 53.154±3.358           | 16.779                |
|                              | Rev M10 VSV-G             | 1   | 5.988±0.660        | 34.587±1.143           | 17.314                |
|                              |                           | 2   | 6.515±0.663        | 54.428±3.033           | 11.971                |
| 293T cells + INr-2           | WT VSV-G HXB2             | 1   | 6.452±0.647        | 33.327±3.226           | 19.361                |
|                              |                           | 2   | 7.020±0.712        | 53.834±3.640           | 13.041                |
|                              | WT VSV-G pLAI             | 1   | 6.436±0.721        | 32.070±1.675           | 20.069                |
|                              |                           | 2   | 6.942±0.696        | 54.595±2.567           | 12.715                |
|                              | Delta Rev VSV-G pLAIY47H2 | 1   | 8.294±1.021        | 32.648±2.057           | 25.404                |
|                              |                           | 2   | 8.912±0.916        | 54.356±3.731           | 16.395                |
|                              | Rev M10 VSV-G             | 1   | 6.118±0.737        | 34.964±5.731           | 17.498                |
|                              |                           | 2   | 6.581±0.672        | 55.994±3.408           | 11.753                |
| 293T cells + INr-1 and 2     | WT VSV-G HXB2             | 1   | 7.957±0.984        | 34.074±1.724           | 23.352                |
|                              |                           | 2   | 8.733±1.148        | 56.216±2.967           | 15.535                |
|                              | WT VSV-G pLAI             | 1   | 7.885±1.050        | 32.527±1.646           | 24.241                |
|                              |                           | 2   | 8.684±1.194        | 54.777±1.116           | 15.853                |
|                              | Delta Rev VSV-G pLAIY47H2 | 1   | 8.612±0.912        | 31.470±1.592           | 27.366                |
|                              |                           | 2   | 9.313±0.930        | 53.239±2.821           | 17.493                |
|                              | Rev M10 VSV-G             | 1   | 7.898±0.929        | 33.387±1.689           | 23.656                |
|                              |                           | 2   | 8.548±1.209        | 54.668±4.286           | 15.635                |
| Rev expressing cells + INr1  | WT VSV-G HXB2             | 1   | 0.460±0.052        | 33.257±0.782           | 1.383                 |
|                              |                           | 2   | 0.510±0.059        | 55.207±2.868           | 0.924                 |
|                              | WT VSV-G pLAI             | 1   | 0.475±0.049        | 31.739±2.116           | 1.496                 |
|                              |                           | 2   | 0.524±0.054        | 54.891±5.063           | 0.955                 |
|                              | Delta Rev VSV-G pLAIY47H2 | 1   | 0.651±0.066        | 31.676±1.897           | 2.056                 |
|                              |                           | 2   | 0.689±0.098        | 54.007±3.107           | 1.275                 |
|                              | Rev M10 VSV-G             | 1   | 0.472±0.048        | 32.181±0.991           | 1.466                 |
|                              |                           | 2   | 0.520±0.052        | 54.851±1.832           | 0.948                 |
| Rev expressing cells + INr-2 | WT VSV-G HXB2             | 1   | 0.526±0.061        | 32.400±1.640           | 1.625                 |
|                              |                           | 2   | 0.599±0.060        | 55.730±2.793           | 1.074                 |
|                              | WT VSV-G pLAI             | 1   | 0.493±0.053        | 34.564±1.749           | 1.426                 |
|                              |                           | 2   | 0.582±0.072        | 55.096±4.648           | 1.056                 |
|                              | Delta Rev VSV-G pLAIY47H2 | 1   | 0.719±0.073        | 31.528±1.595           | 2.280                 |
|                              |                           | 2   | 0.777±0.089        | 56.265±2.821           | 1.381                 |
|                              | Rev M10 VSV-G             | 1   | 0.493±0.050        | 31.756±1.607           | 1.553                 |
|                              |                           | 2   | 0.574±0.069        | 57.573±4.334           | 0.997                 |

|                                    |                           |             |              |              |        |
|------------------------------------|---------------------------|-------------|--------------|--------------|--------|
| Rev expressing cells + INr-1 and 2 | WT VSV-G HXB2             | 1           | 0.742±0.127  | 30.579±1.547 | 2.425  |
|                                    |                           | 2           | 0.865±0.093  | 55.306±3.468 | 1.564  |
|                                    | WT VSV-G pLAI             | 1           | 0.673±0.069  | 31.356±1.587 | 2.145  |
|                                    |                           | 2           | 0.776±0.107  | 55.212±4.040 | 1.405  |
|                                    | Delta Rev VSV-G pLAIY47H2 | 1           | 1.096±0.110  | 34.096±1.725 | 3.215  |
|                                    |                           | 2           | 1.150±0.146  | 55.190±3.140 | 2.084  |
| Rev M10 VSV-G                      | 1                         | 0.646±0.065 | 31.051±1.571 | 2.080        |        |
|                                    | 2                         | 0.778±0.127 | 53.763±2.583 | 1.446        |        |
| Sup T1 + Rev 13-23                 | WT VSV-G pLAI             | 1           | 0.264±0.039  | 29.481±0.856 | 0.896  |
|                                    |                           | 2           | 0.394±0.123  | 53.356±3.774 | 0.738  |
|                                    | Delta Rev VSV-G pLAIY47H2 | 1           | 2.907±0.127  | 33.655±1.865 | 8.638  |
|                                    |                           | 2           | 4.227±0.463  | 51.574±1.767 | 8.195  |
| Sup T1 + Rev 53-73                 | WT VSV-G pLAI             | 1           | 0.308±0.043  | 32.254±2.707 | 0.956  |
|                                    |                           | 2           | 0.454±0.099  | 54.555±3.215 | 0.832  |
|                                    | Delta Rev VSV-G pLAIY47H2 | 1           | 3.330±0.338  | 33.031±1.602 | 10.082 |
|                                    |                           | 2           | 5.254±0.445  | 51.958±2.092 | 10.113 |
| Sup T1 + Rev 13-23 and 53-67       | WT VSV-G pLAI             | 1           | 0.110±0.024  | 30.824±1.473 | 0.356  |
|                                    |                           | 2           | 0.167±0.046  | 54.071±3.458 | 0.310  |
|                                    | Delta Rev VSV-G pLAIY47H2 | 1           | 1.646±0.304  | 31.997±1.455 | 5.143  |
|                                    |                           | 2           | 1.916±0.179  | 51.460±2.231 | 3.723  |
